# Supplementary material for: Low temperature modulates natural peel degreening in lemon fruit independently of endogenous ethylene
Source: PubMed Central journal article supplement (PMC7410192; doi:10.1093/jxb/eraa206), 2020-05-06
Supplement: eraa206_suppl_supplementary-figures-s1-s2.pdf [file eraa206_suppl_supplementary-figures-s1-s2.pdf]

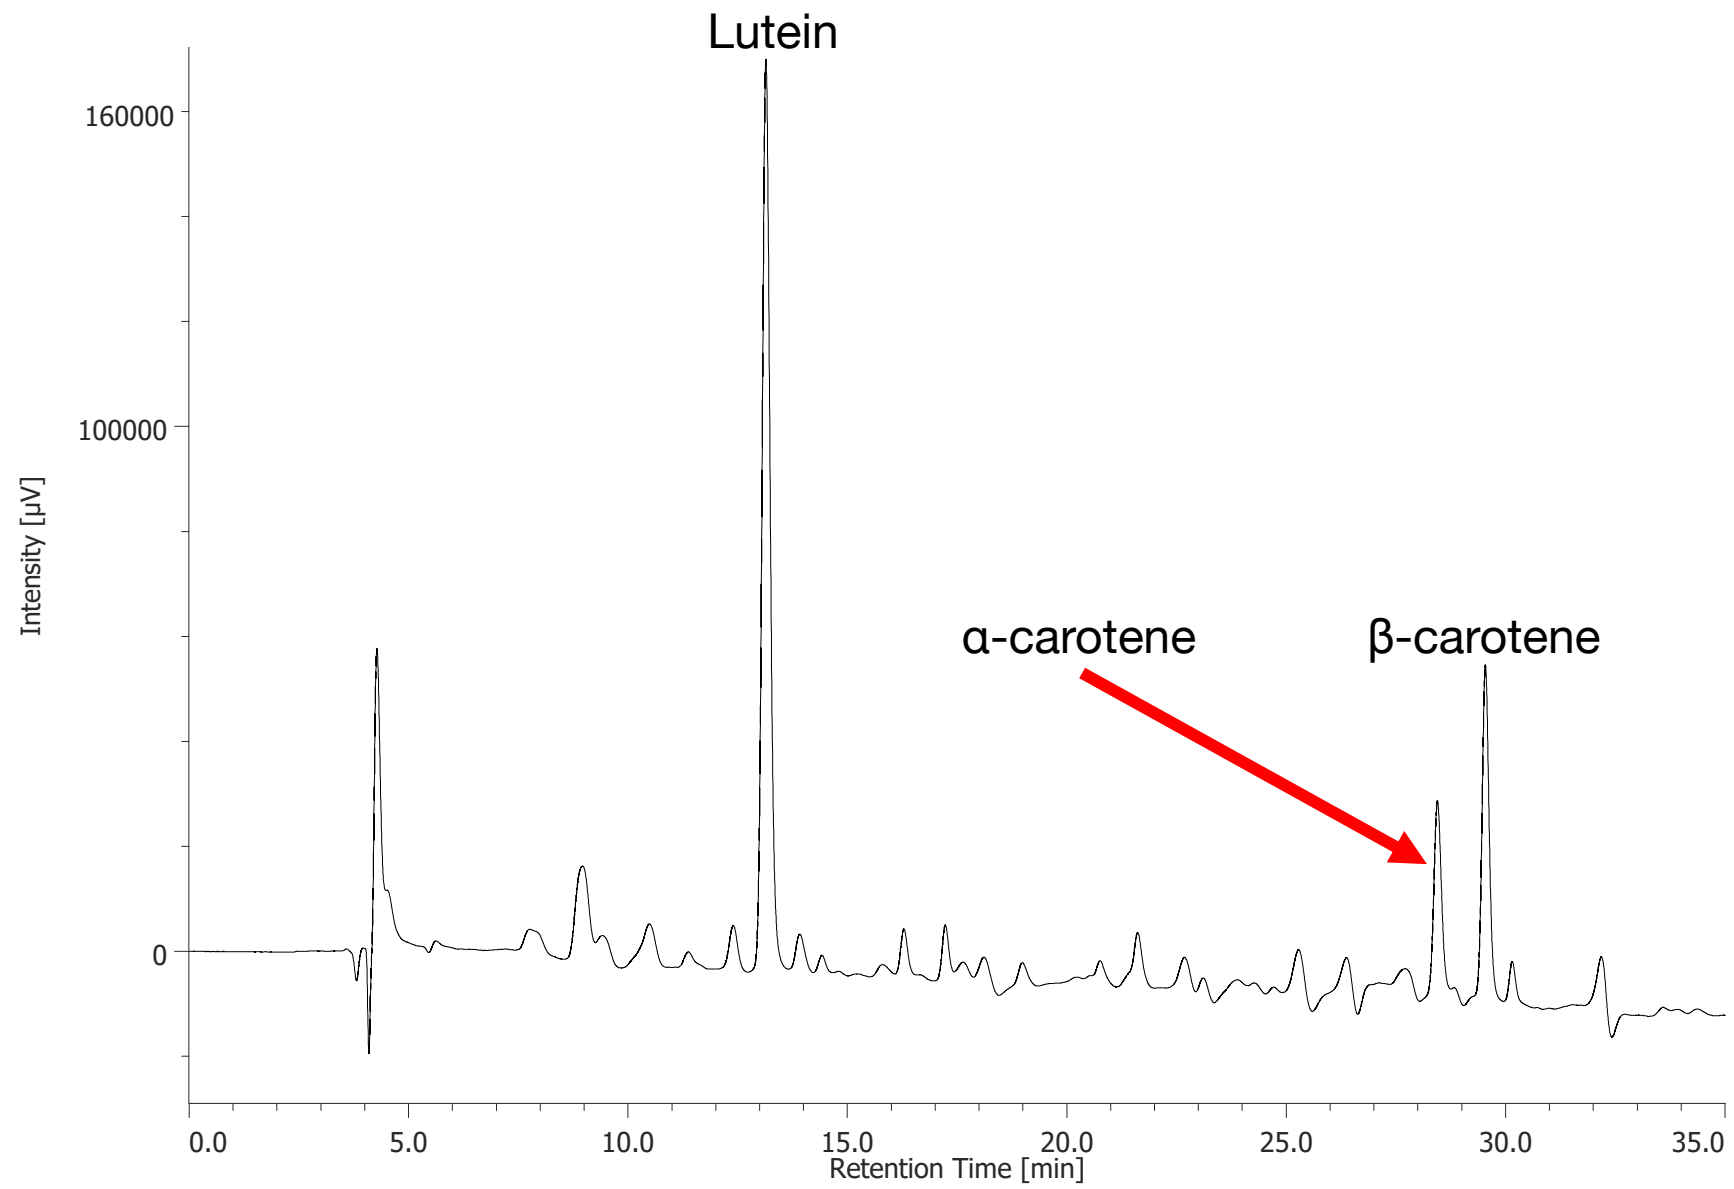

**Fig. S1.** Chromatogram showing the major carotenoid pigments identified in the flavedo of lemom fruit.

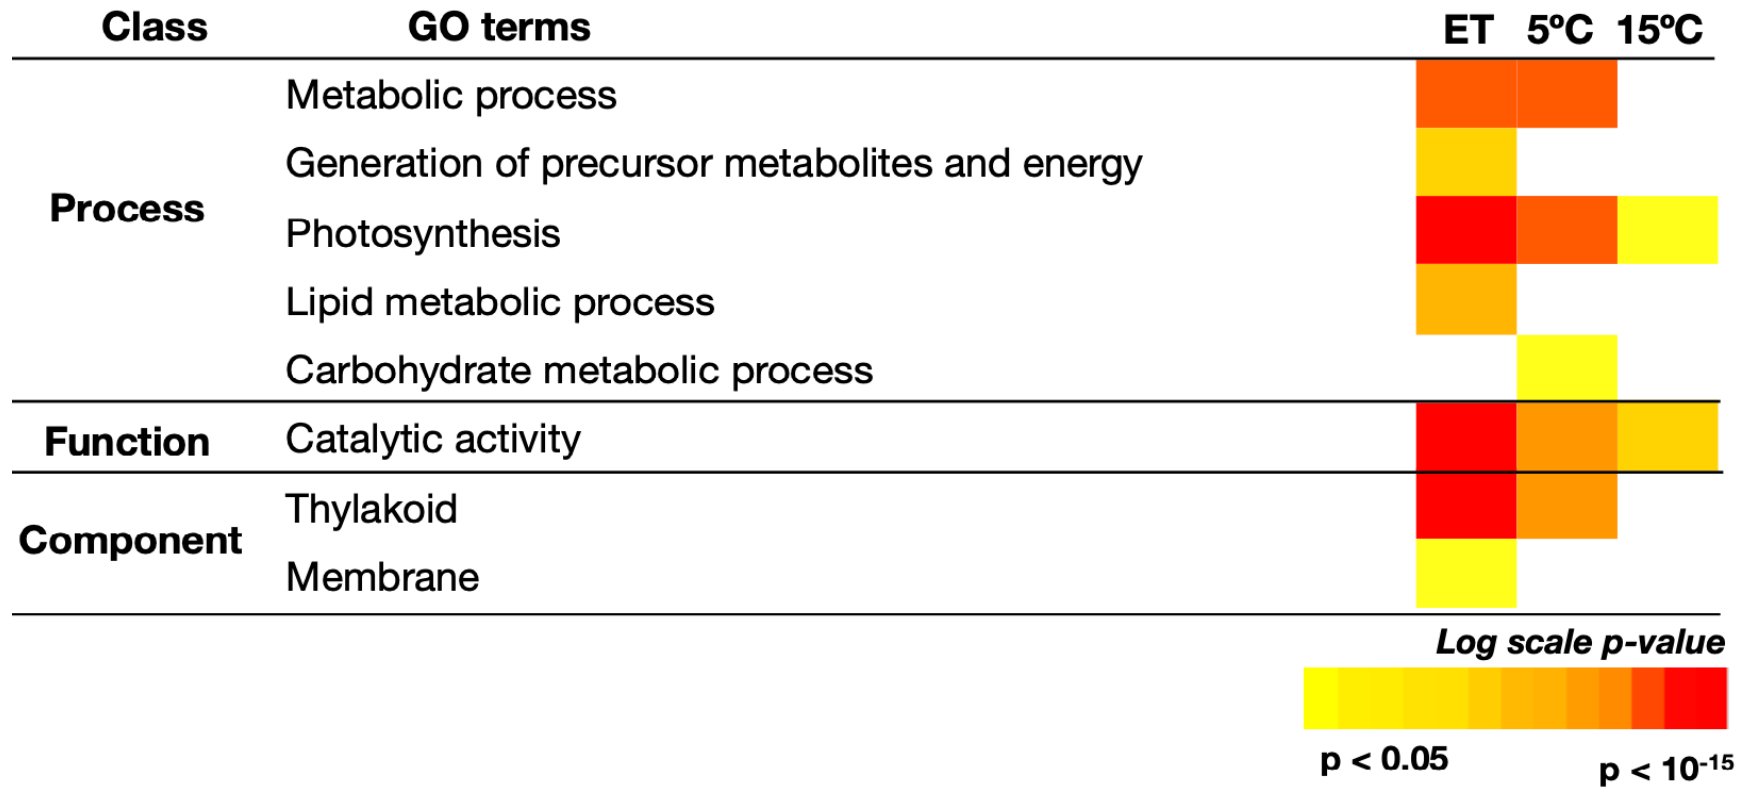

**Fig. S2.** Selected GO terms enriched among the DEGs identified in lemon fruit exposed to ethylene, 5°C and 15°C.
