# Supplementary material for: Low temperature modulates natural peel degreening in lemon fruit independently of endogenous ethylene
Source: PubMed Central journal article supplement (PMC7410192; doi:10.1093/jxb/eraa206), 2020-05-06
Supplement: eraa206_suppl_supplementary-tables-s1-s2.pdf [file eraa206_suppl_supplementary-tables-s1-s2.pdf]

**Supplementary Table 1.** Liquid chromatography conditions. MeCN: methyl cyanide (acetonitrile), SA: salicylic acid.

| <b>Method No.</b> | <b>Hormone</b> | <b>Solvent A</b>                       | <b>Solvent B</b>                      | <b>Gradient (Composition of solvent B)</b> |
|-------------------|----------------|----------------------------------------|---------------------------------------|--------------------------------------------|
| <b>1</b>          | Acid           | Water containing<br>0.01 % acetic acid | MeCN containing<br>0.05 % acetic acid | 3 to 55 % 22 min                           |
| <b>2</b>          | CK             | Water containing<br>0.01 % acetic acid | MeOH containing<br>0.2 % acetic acid  | 3 to 97 % 16 min                           |
| <b>3</b>          | SA             | Water containing<br>0.1 % formic acid  | MeCN containing<br>0.1 % formic acid  | 3 to 98 % 10 min                           |

**Supplementary Table 2.** Parameters for LC-ESI-MS/MS analysis (Agilent 1260-6410). GA<sub>1</sub>: gibberellin A<sub>1</sub>, IAA: indole-3-acetic acid, ABA: abscisic acid, JA: jasmonic acid, GA<sub>4</sub>: gibberellin A<sub>4</sub>, JA-Ile: jasmonoyl-*L*-isoleucine, tZ: *trans*-zeatin, iP: N<sup>6</sup>-isopentenyladenine, SA: salicylic acid.

|                                                                                        | LC method | Retention time on LC (min) | ESI | MS/MS transitions for quantifications ( <i>m/z</i> ) | Collision energy (V) | Fragmentor V |
|----------------------------------------------------------------------------------------|-----------|----------------------------|-----|------------------------------------------------------|----------------------|--------------|
| GA <sub>1</sub><br>D <sub>2</sub> -GA <sub>1</sub>                                     | 1         | 8.2                        | -   | 347/273<br>349/275                                   | 18                   | 160          |
| IAA<br>D <sub>2</sub> -IAA<br><sup>13</sup> C <sub>6</sub> -IAA<br>D <sub>7</sub> -IAA | 1         | 9.2                        | +   | 176/130<br>178/132<br>182/136<br>183/135, 136, 137   | 15                   | 90           |
| ABA<br>D <sub>6</sub> -ABA                                                             | 1         | 11.5                       | -   | 263/153<br>269/159                                   | 4                    | 130          |
| JA<br>D <sub>2</sub> -JA<br>D <sub>5</sub> -JA                                         | 1         | 13.0                       | -   | 209/59<br>211/59<br>214/62                           | 11                   | 135          |
| GA <sub>4</sub><br>D <sub>2</sub> -GA <sub>4</sub>                                     | 1         | 15.4                       | -   | 331.2/257<br>333.2/259                               | 20                   | 160          |
| JA-Ile<br><sup>13</sup> C <sub>6</sub> -JA-Ile                                         | 1         | 16.2                       | -   | 321.2/130<br>338.4/136.2                             | 17                   | 140          |
| tZ<br>D <sub>5</sub> -tZ                                                               | 2         | 8.1                        | +   | 220.3/136.3<br>225.3/136.3, 137.3                    | 12                   | 100          |
| iP<br>D <sub>6</sub> -iP                                                               | 2         | 12                         | +   | 204.4/136.4<br>210.4/137.4                           | 11                   | 110          |
| SA<br>D <sub>4</sub> -SA                                                               | 3         | 5.3                        | -   | 137/93<br>141/97                                     | 15                   | 90           |
